# Supplementary material
Source: PubMed Central journal article supplement (PMC4256310)
Supplement: supp_M114.582353_jbc.M114.582353-1.pdf [file supp_M114.582353_jbc.M114.582353-1.pdf]

Identification of the Major Prostaglandin Glycerol Ester Hydrolase in Human Cancer Cells\*

**Joseph D. Manna<sup>1</sup>, James A. Wepy<sup>1</sup>, Kenneth Hsu<sup>2</sup>, Jae Won Chang<sup>2</sup>, Benjamin F. Cravatt<sup>2</sup>,  
Lawrence J. Marnett<sup>1</sup>**

<sup>1</sup>A.B. Hancock Jr. Memorial Laboratory for Cancer Research, Departments of Biochemistry, Chemistry, and Pharmacology, Vanderbilt Institute of Chemical Biology, Center in Molecular Toxicology, Vanderbilt-Ingram Cancer Center, Vanderbilt University School of Medicine, Nashville TN 37232

<sup>2</sup>The Skaggs Institute for Chemical Biology and the Department of Chemical Physiology, The Scripps Research Institute, La Jolla, California 92037

\*Running title: *Identification of prostaglandin glycerol ester hydrolase*

To whom correspondence should be addressed: Lawrence J. Marnett. Departments of Biochemistry, Chemistry, and Pharmacology, Vanderbilt Institute of Chemical Biology, Center in Molecular Toxicology, Vanderbilt Institute of Chemical Biology, Center in Molecular Toxicology, Vanderbilt-Ingram Cancer Center, Vanderbilt University School of Medicine, Nashville TN 37232. Tel.: (615) 343-7329. Fax: (615) 343-7534. E-mail: [larry.marnett@vanderbilt.edu](mailto:larry.marnett@vanderbilt.edu)

## **Supplemental Information**

Identification of prostaglandin glycerol ester hydrolase

| Activity (ng PGE <sub>2</sub> /μg protein)                                | LNCaP        | MCF7        | 231MFP        | PC3        |
|---------------------------------------------------------------------------|--------------|-------------|---------------|------------|
| <b>Hydrolytic Activity</b>                                                | <b>34</b>    | <b>52</b>   | <b>65</b>     | <b>70</b>  |
| <b>Serine Hydrolases (Spectral Counting)</b>                              | <b>LNCaP</b> | <b>MCF7</b> | <b>231MFP</b> | <b>PC3</b> |
| FASN Fatty acid synthase                                                  | 1850         | 425         | 348           | 1324       |
| <b>MGLL monoglyceride lipase</b>                                          | 11           | 7           | 37            | 54         |
| FAAH2 Fatty-acid amide hydrolase 2                                        | 6            | 0           | 0             | 0          |
| PREP prolyl endopeptidase                                                 | 455          | 407         | 312           | 423        |
| KIAA1363 (AADACL1 arylacetamide deacetylase-like 1)                       | 58           | 1           | 26            | 373        |
| APEH Acylamino-acid-releasing enzyme                                      | 571          | 145         | 165           | 642        |
| PAFAH1B2 Platelet-activating factor acetylhydrolase IB subunit beta       | 19           | 84          | 105           | 22         |
| PAFAH1B3 Platelet-activating factor acetylhydrolase IB subunit gamma      | 72           | 165         | 154           | 0          |
| PAFAH2 Platelet-activating factor acetylhydrolase 2, cytoplasmic          | 19           | 9           | 5             | 22         |
| ABHD2 Abhydrolase domain-containing protein 2                             | 22           | 0           | 0             | 0          |
| ABHD3 Abhydrolase domain-containing protein 3                             | 2            | 0           | 0             | 7          |
| ABHD4 Abhydrolase domain-containing protein 4                             | 27           | 0           | 0             | 5          |
| ABHD6 Abhydrolase domain-containing protein 6                             | 55           | 0           | 1             | 62         |
| ABHD10 Abhydrolase domain-containing protein 10                           | 622          | 112         | 274           | 534        |
| ABHD11 Abhydrolase domain-containing protein 11                           | 258          | 169         | 64            | 136        |
| ABHD12 Abhydrolase domain-containing protein 12                           | 109          | 0           | 1             | 107        |
| ABHD13 Abhydrolase domain-containing protein 13                           | 2            | 0           | 0             | 1          |
| LYPLA1 Acyl-protein thioesterase 1                                        | 81           | 92          | 42            | 21         |
| <b>LYPLA2 Acyl-protein thioesterase 2</b>                                 | 31           | 95          | 97            | 138        |
| LYPLAL1 Lysophospholipase-like protein 1                                  | 73           | 44          | 40            | 25         |
| DPP4 Dipeptidyl peptidase 4                                               | 38           | 0           | 0             | 89         |
| DPP7 similar to Dipeptidyl-peptidase 2                                    | 170          | 3           | 1             | 14         |
| DPP8 Dipeptidyl peptidase 8                                               | 9            | 15          | 12            | 16         |
| DPP9 Dipeptidyl peptidase 9                                               | 50           | 57          | 84            | 445        |
| <b>CES1 Liver carboxylesterase 1</b>                                      | 0            | 0           | 0             | 0          |
| CES2 carboxylesterase 2                                                   | 18           | 11          | 12            | 8          |
| CES3 esterase 3                                                           | 2            | 0           | 0             | 0          |
| <b>PPT1 Palmitoyl-protein thioesterase 1</b>                              | 1            | 0           | 0             | 0          |
| PPT2 palmitoyl-protein thioesterase 2                                     | 3            | 4           | 21            | 22         |
| PRCP prolylcarboxypeptidase isoform 2 preproprotein                       | 77           | 25          | 19            | 49         |
| PREPL prolyl endopeptidase-like isoform C                                 | 63           | 33          | 30            | 98         |
| RBBP9 Retinoblastoma-binding protein 9                                    | 9            | 23          | 29            | 10         |
| PNPLA8 Patatin-like phospholipase domain-containing protein 8             | 15           | 0           | 0             | 11         |
| PNPLA6 Neuropathy target esterase                                         | 46           | 0           | 1             | 211        |
| PNPLA4 Patatin-like phospholipase domain-containing protein 4             | 49           | 3           | 6             | 42         |
| SIAE Sialate O-acetyltransferase                                          | 94           | 19          | 26            | 10         |
| CTSA cathepsin A precursor                                                | 12           | 25          | 11            | 8          |
| PPME1 Protein phosphatase methylesterase 1                                | 63           | 20          | 17            | 48         |
| Abhydrolase domain-containing protein FAM108A1                            | 7            | 0           | 0             | 8          |
| Abhydrolase domain-containing protein FAM108B1                            | 12           | 0           | 0             | 31         |
| PARL Presenilins-associated rhomboid-like protein                         | 8            | 0           | 0             | 8          |
| CPVL Probable serine carboxypeptidase                                     | 0            | 0           | 7             | 27         |
| DAGLB Sn1-specific diacylglycerol lipase beta                             | 6            | 0           | 0             | 20         |
| PLAT Tissue-type plasminogen activator precursor                          | 0            | 0           | 1             | 9          |
| LIPA, highly similar to lysosomal acid lipase/cholesteryl ester hydrolase | 0            | 0           | 5             | 0          |
| HTRA1 Serine protease HTRA1                                               | 0            | 0           | 0             | 0          |
| PGAP1 GPI inositol-deacylase                                              | 0            | 0           | 0             | 2          |
| SCPEP Retinoid-inducible serine carboxypeptidase                          | 121          | 0           | 0             | 47         |
| PLAU urokinase plasminogen activator                                      | 0            | 0           | 0             | 1          |
| PLA2G4A Cytosolic phospholipase A2                                        | 0            | 0           | 0             | 1          |
| IAH1 Isoamyl acetate-hydrolyzing esterase 1                               | 2            | 6           | 5             | 5          |
| QRSL1 Glutaminyl-tRNA synthase-like protein 1                             | 1            | 1           | 1             | 0          |
| BCHE Cholinesterase precursor                                             | 10           | 0           | 0             | 0          |
| BAT5                                                                      | 28           | 0           | 0             | 20         |
| LACTB                                                                     | 2            | 0           | 0             | 2          |

**Supplemental Data 1.** Activity-based protein profiling, multidimensional protein identification technology (ABPP-MuDPIT) analysis of serine hydrolases in human cancer cell lines (31, 32). PGE<sub>2</sub>-G hydrolase activity was compared to known serine hydrolase inventories.
